# Supplementary material for: Association between Triglyceride-Glucose Index and Risk of Sepsis-Associated Liver Injury and Mortality in Critically Ill Patients: A Retrospective Cohort Study
Source: Research Square preprint supplement (doi:10.21203/rs.3.rs-6703771/v1), 2025-06-18
Supplement: Supplementary file 1 [file 058ba5d77cc872ebd28c3ace.docx]

**Table 3** The association between TyG index groups and all-cause mortality

| **Variable** | **Total** | **Event (%)** | **Followup.Time** | **Model 1** | |  | **Model 2** | |  | **Model 3** | |
| --- | --- | --- | --- | --- | --- | --- | --- | --- | --- | --- | --- |
| **HR (95%CI)** | ***P*-value** |  | **HR (95%CI)** | ***P*-value** |  | **HR (95%CI)** | ***P*-value** |
| **28-day mortality** | | | | | | | | | | | |
| TyG continuous | 4343 | 801 (18.4) | 1388321.51623629 | 1.25 (1.16~1.36) | <0.001 |  | 1.44 (1.32~1.57) | <0.001 |  | 1.59 (1.37~1.84) | <0.001 |
| TyG tertiles |  |  |  |  |  |  |  |  |  |  |  |
| T1 | 1448 | 222 (15.3) | 486092.688635698 | 1(Ref) |  |  | 1(Ref) |  |  | 1(Ref) |  |
| T2 | 1446 | 251 (17.4) | 464651.41691932 | 1.15 (0.96~1.38) | 0.131 |  | 1.24 (1.04~1.49) | 0.018 |  | 1.22 (1.01~1.49) | 0.043 |
| T3 | 1449 | 328 (22.6) | 437577.41068127 | 1.56 (1.31~1.85) | <0.001 |  | 1.94 (1.63~2.31) | <0.001 |  | 1.94 (1.52~2.49) | <0.001 |
| *P* for trend |  |  |  |  | <0.001 |  |  | <0.001 |  |  | <0.001 |
| **90-day mortality** | | | | | | | | | | | |
| TyG continuous | 4343 | 1009 (23.2) | 1388321.51623629 | 1.22 (1.13~1.31) | <0.001 |  | 1.42 (1.31~1.53) | <0.001 |  | 1.51 (1.32~1.73) | <0.001 |
| TyG tertiles |  |  |  |  |  |  |  |  |  |  |  |
| T1 | 1448 | 290 (20) | 486092.688635698 | 1(Ref) |  |  | 1(Ref) |  |  | 1(Ref) |  |
| T2 | 1446 | 323 (22.3) | 464651.41691932 | 1.14 (0.97~1.33) | 0.115 |  | 1.23 (1.05~1.44) | 0.011 |  | 1.19 (1~1.41) | 0.048 |
| T3 | 1449 | 396 (27.3) | 437577.41068127 | 1.45 (1.25~1.69) | <0.001 |  | 1.83 (1.56~2.13) | <0.001 |  | 1.7 (1.36~2.12) | <0.001 |
| *P* for trend |  |  |  |  | <0.001 |  |  | <0.001 |  |  | <0.001 |
| **365-day mortality** | | | | | | | | | | | |
| TyG continuous | 4343 | 1252 (28.8) | 1388321.51623629 | 1.15 (1.08~1.23) | <0.001 |  | 1.34 (1.25~1.44) | <0.001 |  | 1.43 (1.26~1.61) | <0.001 |
| TyG tertiles |  |  |  |  |  |  |  |  |  |  |  |
| T1 | 1448 | 367 (25.3) | 486092.688635698 | 1(Ref) |  |  | 1(Ref) |  |  | 1(Ref) |  |
| T2 | 1446 | 424 (29.3) | 464651.41691932 | 1.18 (1.03~1.36) | 0.018 |  | 1.28 (1.12~1.48) | <0.001 |  | 1.27 (1.09~1.47) | 0.002 |
| T3 | 1449 | 461 (31.8) | 437577.41068127 | 1.34 (1.17~1.54) | <0.001 |  | 1.72 (1.49~1.97) | <0.001 |  | 1.63 (1.33~1.98) | <0.001 |
| *P* for trend |  |  |  |  | <0.001 |  |  | <0.001 |  |  | <0.001 |

TyG index: T1 (7.30, 8.60), T2 (8.60, 9.22), T3 (9.22, 11.98). HR: Odds Ratio; CI: confidential interval

Model 1: unadjusted

Model 2: adjusted for age, sex, race, year group

Model 3: adjusted for age, sex, race, year group, heartrate, systolic blood pressure, diastolic blood pressure, mean arterial pressure, peripheral capillary oxygen saturation, resprate, temperature, white blood cell count, hematocrit, hemoglobin, platelets, blood urea nitrogen, creatinine, albumin, high-density lipoprotein, low-density lipoprotein, calcium, magnesium, potassium, sodium, phosphate, chloride, prothrombin time, activated partial thromboplastin time, alanine transaminase, aspartate transaminase, alkaline phosphatase, pH, partial pressure of carbon dioxide partial pressure of oxygen, hypertension, congestive heart failure, chronic pulmonary disease, insulin, lipid lowering drugs, hypoglycemic drugs, cholesterol total, hemoglobina1c, diabetes
