# Supplementary material for: Association between Triglyceride-Glucose Index and Risk of Sepsis-Associated Liver Injury and Mortality in Critically Ill Patients: A Retrospective Cohort Study
Source: Research Square preprint supplement (doi:10.21203/rs.3.rs-6703771/v1), 2025-06-18
Supplement: Supplementary file 2 [file 3e28e7324e5d756bb1ca0622.docx]

**Supplementary Figure legends**

**Fig. S1** Kaplan-Meier Survival Plot for all-cause mortality. **A** 28-day mortality; **B** 90-day mortality; **C** 365-day mortality. TyG index: T1 (7.30, 8.60), T2 (8.60, 9.22), T3 (9.22, 11.98)

**Fig. S2** Association between TyG index and all-cause mortality in critically ill patients. **A** 28-day mortality; **B** 90-day mortality; **C** 365-day mortality. Solid and dashed lines represent the predicted values and 95% confidence intervals, respectively. TyG index, triglyceride-glucose index

**Fig. S3** Subgroup analyses for the association of TyG index with all-cause mortality. **A** 28-day mortality; **B** 90-day mortality; **C** 365-day mortality. HR, hazard ratio; CI, confidential interval.
