# Supplementary material for: Association between Triglyceride-Glucose Index and Risk of Sepsis-Associated Liver Injury and Mortality in Critically Ill Patients: A Retrospective Cohort Study
Source: Research Square preprint supplement (doi:10.21203/rs.3.rs-6703771/v1), 2025-06-18
Supplement: Supplementary file 3 [file 4e40912d5f5ccd9a54025019.docx]

Table S1 Missing data.

| Variable | Number | percentage% |
| --- | --- | --- |
| Lactate | 2318 | 53.3732 |
| BMI | 1992 | 45.8669 |
| Height | 1979 | 45.5676 |
| pH | 1955 | 45.015 |
| Base Excess | 1954 | 44.9919 |
| PCO2 | 1954 | 44.9919 |
| PO2 | 1954 | 44.9919 |
| LDH | 1893 | 43.5874 |
| Hemoglobina1c | 1874 | 43.1499 |
| HDL | 1356 | 31.2227 |
| LDL | 1306 | 30.0714 |
| Cholesterol total | 1304 | 30.0253 |
| Albumin | 938 | 21.598 |
| ALT | 303 | 6.9767 |
| ALP | 298 | 6.8616 |
| AST | 283 | 6.5162 |
| Phosphate | 169 | 3.8913 |
| Magnesium | 167 | 3.8453 |
| PTT | 96 | 2.2105 |
| Weight | 95 | 2.1874 |
| PT | 84 | 1.9341 |
| INR | 83 | 1.9111 |
| Temperature | 71 | 1.6348 |
| DBP | 36 | 0.8289 |
| SBP | 36 | 0.8289 |
| T-Bil | 28 | 0.6447 |
| Calcium | 21 | 0.4835 |
| Respirates | 16 | 0.3684 |
| Platelets | 7 | 0.1612 |
| SPO2 | 7 | 0.1612 |
| Heartrate | 6 | 0.1382 |
| MAP | 6 | 0.1382 |
| Hemoglobin | 5 | 0.1151 |
| Anion gap | 4 | 0.0921 |
| Bicarbonate | 4 | 0.0921 |
| WBC | 4 | 0.0921 |
| Chloride | 3 | 0.0691 |
| Hematocrit | 3 | 0.0691 |
| Creatinine | 2 | 0.0461 |
| BUN | 1 | 0.023 |
| Potassium | 1 | 0.023 |
| Sodium | 1 | 0.023 |

Abbreviations: SBP, systolic blood pressure; DBP, diastolic blood pressure; MAP, mean arterial pressure; SpO2, peripheral capillary oxygen saturation; PCO2, partial pressure of carbon dioxide; PO2, partial pressure of oxygen; WBC, white blood cell counts; T-Bil, bilirubin total; BUN, blood urine nitrogen; ALT, alanine transaminase; AST, aspartate transaminase; ALP, alkaline phosphatase; LDH, lactate dehydrogenase; HDL, high-density lipoprotein; LDL, low-density lipoprotein; INR, international normalized ratio; PT, prothrombin time; PTT, activated partial thromboplastin time.
